# Supplementary material for: Long noncoding RNA GSTM3TV2 upregulates LAT2 and OLR1 by competitively sponging let-7 to promote gemcitabine resistance in pancreatic cancer
Source: Springer Nature journal article supplement (doi:10.1186/s13045-019-0777-7), 2019-09-12

Figure S1

A

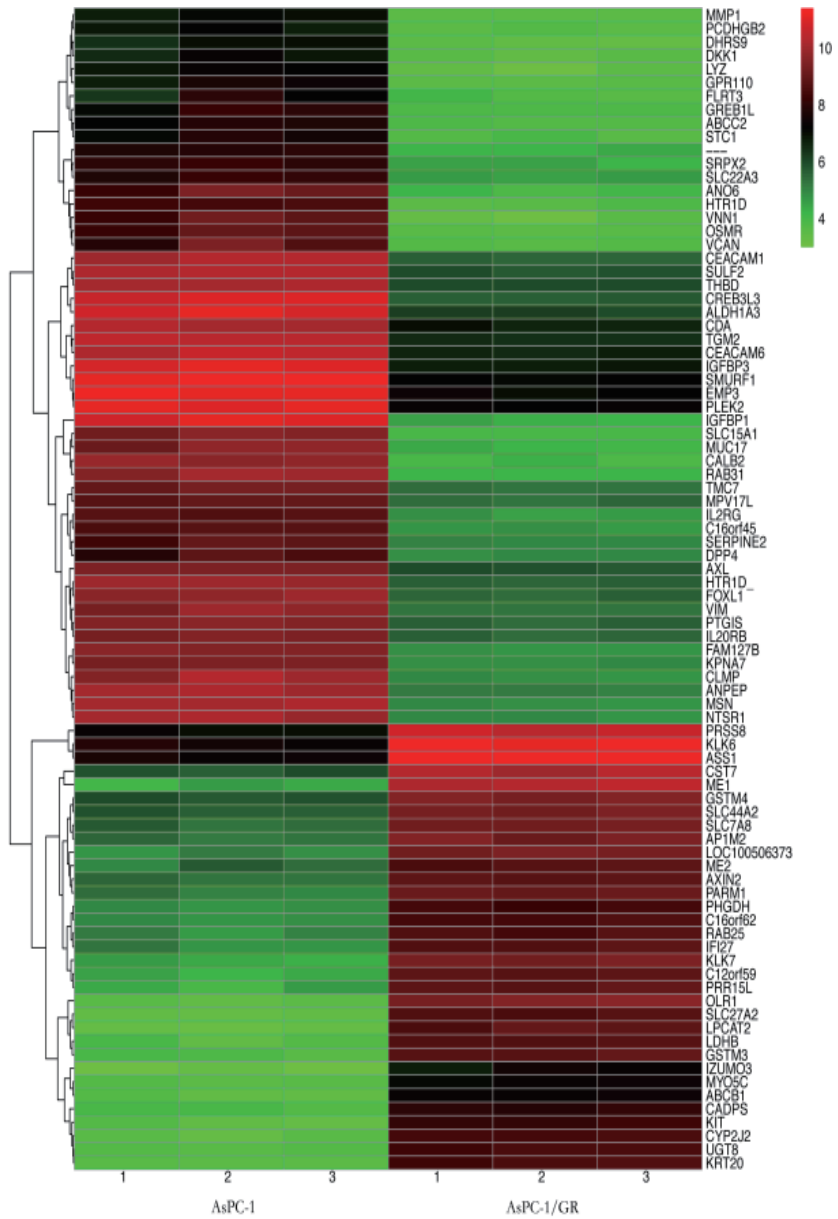

B

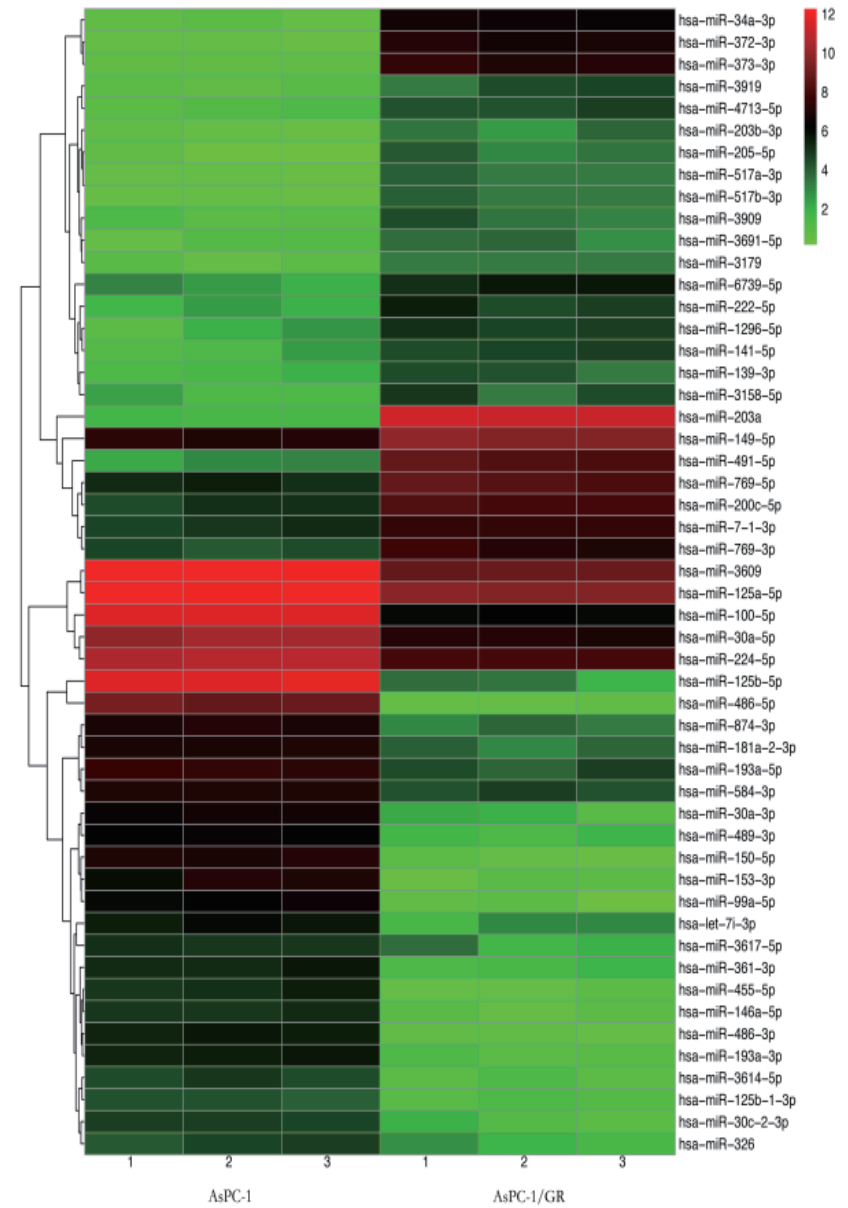

Supplement: MOESM3 [file 17166158]
